# Supplementary material for: Estimation of Canine Leishmania Infection Prevalence in Six Cities of the Algerian Littoral Zone Using a Bayesian Approach
Source: PubMed Central journal article supplement (PMC4368835; doi:10.1371/journal.pone.0117313), 2015-03-20
Supplement: pone.0117313.s002.pdf [file pone.0117313.s002.pdf]

## S2 Listing 2

**Listing 2:** Hui-Walter model estimation in a Bayesian framework (data shown for Tlemcen)

```
1 model
2 {
3   res1[1:4] ~ dmulti(p1[1:4], n1)
4   res2[1:4] ~ dmulti(p2[1:4], n2)
5   p1[1] <- th[1]*th[3]*th[4] + (1-th[1])*(1-th[5])*(1-th[6])
6   p1[2] <- th[1]*th[3]*(1-th[4]) + (1-th[1])*(1-th[5])*th[6]
7   p1[3] <- th[1]*(1-th[3])*th[4] + (1-th[1])*th[5]*(1-th[6])
8   p1[4] <- th[1]*(1-th[3])*(1-th[4]) + (1-th[1])*th[5]*th[6]
9   p2[1] <- th[2]*th[3]*th[4] + (1-th[2])*(1-th[5])*(1-th[6])
10  p2[2] <- th[2]*th[3]*(1-th[4]) + (1-th[2])*(1-th[5])*th[6]
11  p2[3] <- th[2]*(1-th[3])*th[4] + (1-th[2])*th[5]*(1-th[6])
12  p2[4] <- th[2]*(1-th[3])*(1-th[4]) + (1-th[2])*th[5]*th[6]
13  th[1] ~ dunif(0,0.5)
14  th[2] ~ dunif(0,0.5)
15  th[3] ~ dunif(0,1)
16  th[4] ~ dunif(0,1)
17  th[5] ~ dunif(0,1)
18  th[6] ~ dunif(0,1)
19  res3[1:4] ~ dmulti(p1[1:4], n1)
20  res4[1:4] ~ dmulti(p2[1:4], n2)
21  for (i in 1:4)
22  {
23    d1[i] <- res1[i]*log(max(res1[i],1)/(p1[i]*n1))
24    d2[i] <- res3[i]*log(max(res3[i],1)/(p1[i]*n1))
25    d3[i] <- res2[i]*log(max(res2[i],1)/(p2[i]*n2))
26    d4[i] <- res4[i]*log(max(res4[i],1)/(p2[i]*n2))
27  }
28  bayesp[1] <- step( sum(d1[]) - sum(d2[]) )
29  bayesp[2] <- step( sum(d3[]) - sum(d4[]) )
30  }
31  list(res1 = c(16, 47, 12, 107), n1 = 182 , res2 = c(16, 29, 13, 94),
       n2 = 152)
```
