# Supplementary material for: Estimation of Canine Leishmania Infection Prevalence in Six Cities of the Algerian Littoral Zone Using a Bayesian Approach
Source: PubMed Central journal article supplement (PMC4368835; doi:10.1371/journal.pone.0117313), 2015-03-20
Supplement: pone.0117313.s003.pdf [file pone.0117313.s003.pdf]

## S3 Listing 3

**Listing 3:** Test characteristics and CanL prevalence when localities are divided in two groups

```
1 model
2 {
3 res01 [1:4] ~ dmulti(p01 [1:4], n01)
4 res02 [1:4] ~ dmulti(p02 [1:4], n02)
5 res03 [1:4] ~ dmulti(p03 [1:4], n03)
6 res04 [1:4] ~ dmulti(p04 [1:4], n04)
7 res05 [1:4] ~ dmulti(p05 [1:4], n05)
8 res06 [1:4] ~ dmulti(p06 [1:4], n06)
9 res07 [1:4] ~ dmulti(p07 [1:4], n07)
10 res08 [1:4] ~ dmulti(p08 [1:4], n08)
11 res09 [1:4] ~ dmulti(p09 [1:4], n09)
12 res10 [1:4] ~ dmulti(p10 [1:4], n10)
13 res11 [1:4] ~ dmulti(p11 [1:4], n11)
14 res12 [1:4] ~ dmulti(p12 [1:4], n12)
15
16 p01 [1] <- th [ 1] * th [13] * th [15] + (1-th [ 1])*(1-th [14])*(1-th
17 [18])
18 p01 [2] <- th [ 1] * th [13] *(1-th [15]) + (1-th [ 1])*(1-th [14]) * th
19 [18]
20 p01 [3] <- th [ 1] *(1-th [13]) * th [16] + (1-th [ 1]) * th [14] *(1-th
21 [17])
22 p01 [4] <- th [ 1] *(1-th [13]) *(1-th [16]) + (1-th [ 1]) * th [14] * th
23 [17]
24
25 p02 [1] <- th [ 2] * th [13] * th [15] + (1-th [ 2])*(1-th [14])*(1-th
26 [18])
27 p02 [2] <- th [ 2] * th [13] *(1-th [15]) + (1-th [ 2])*(1-th [14]) * th
28 [18]
29 p02 [3] <- th [ 2] *(1-th [13]) * th [16] + (1-th [ 2]) * th [14] *(1-th
30 [17])
31 p02 [4] <- th [ 2] *(1-th [13]) *(1-th [16]) + (1-th [ 2]) * th [14] * th
32 [17]
33
34 p03 [1] <- th [ 3] * th [19] * th [21] + (1-th [ 3])*(1-th [20])*(1-th
35 [24])
36 p03 [2] <- th [ 3] * th [19] *(1-th [21]) + (1-th [ 3])*(1-th [20]) * th
37 [24]
38 p03 [3] <- th [ 3] *(1-th [19]) * th [22] + (1-th [ 3]) * th [20] *(1-th
39 [23])
40 p03 [4] <- th [ 3] *(1-th [19]) *(1-th [22]) + (1-th [ 3]) * th [20] * th
41 [23]
42
43 p04 [1] <- th [ 4] * th [19] * th [21] + (1-th [ 4])*(1-th [20])*(1-th
44 [24])
45 p04 [2] <- th [ 4] * th [19] *(1-th [21]) + (1-th [ 4])*(1-th [20]) * th
46 [24]
47 p04 [3] <- th [ 4] *(1-th [19]) * th [22] + (1-th [ 4]) * th [20] *(1-th
48 [23])
49 p04 [4] <- th [ 4] *(1-th [19]) *(1-th [22]) + (1-th [ 4]) * th [20] * th
50 [23]
51
52 p05 [1] <- th [ 5] * th [25] * th [27] + (1-th [ 5])*(1-th [26])*(1-th
```

Listing 3 (Cont.): Test characteristics and CanL prevalence when localities are divided in two groups

```

35 p05 [2] <- th [ 5] * th [25] * (1-th [27]) + (1-th [ 5]) * (1-th [26]) * th
36 p05 [3] <- th [ 5] * (1-th [25]) * th [28] + (1-th [ 5]) * th [26] * (1-th
37 p05 [4] <- th [ 5] * (1-th [25]) * (1-th [28]) + (1-th [ 5]) * th [26] * th
38 p06 [1] <- th [ 6] * th [25] * th [27] + (1-th [ 6]) * (1-th [26]) * (1-th
39 p06 [2] <- th [ 6] * th [25] * (1-th [27]) + (1-th [ 6]) * (1-th [26]) * th
40 p06 [3] <- th [ 6] * (1-th [25]) * th [28] + (1-th [ 6]) * th [26] * (1-th
41 p06 [4] <- th [ 6] * (1-th [25]) * (1-th [28]) + (1-th [ 6]) * th [26] * th
42 p07 [1] <- th [ 7] * th [25] * th [27] + (1-th [ 7]) * (1-th [26]) * (1-th
43 p07 [2] <- th [ 7] * th [25] * (1-th [27]) + (1-th [ 7]) * (1-th [26]) * th
44 p07 [3] <- th [ 7] * (1-th [25]) * th [28] + (1-th [ 7]) * th [26] * (1-th
45 p07 [4] <- th [ 7] * (1-th [25]) * (1-th [28]) + (1-th [ 7]) * th [26] * th
46 p08 [1] <- th [ 8] * th [25] * th [27] + (1-th [ 8]) * (1-th [26]) * (1-th
47 p08 [2] <- th [ 8] * th [25] * (1-th [27]) + (1-th [ 8]) * (1-th [26]) * th
48 p08 [3] <- th [ 8] * (1-th [25]) * th [28] + (1-th [ 8]) * th [26] * (1-th
49 p08 [4] <- th [ 8] * (1-th [25]) * (1-th [28]) + (1-th [ 8]) * th [26] * th
50
51 p09 [1] <- th [ 9] * th [31] * th [33] + (1-th [ 9]) * (1-th [32]) * (1-th
52 p09 [2] <- th [ 9] * th [31] * (1-th [33]) + (1-th [ 9]) * (1-th [32]) * th
53 p09 [3] <- th [ 9] * (1-th [31]) * th [34] + (1-th [ 9]) * th [32] * (1-th
54 p09 [4] <- th [ 9] * (1-th [31]) * (1-th [34]) + (1-th [ 9]) * th [32] * th
55 p10 [1] <- th [10] * th [31] * th [33] + (1-th [10]) * (1-th [32]) * (1-th
56 p10 [2] <- th [10] * th [31] * (1-th [33]) + (1-th [10]) * (1-th [32]) * th
57 p10 [3] <- th [10] * (1-th [31]) * th [34] + (1-th [10]) * th [32] * (1-th
58 p10 [4] <- th [10] * (1-th [31]) * (1-th [34]) + (1-th [10]) * th [32] * th
59 p11 [1] <- th [11] * th [31] * th [33] + (1-th [11]) * (1-th [32]) * (1-th
60 p11 [2] <- th [11] * th [31] * (1-th [33]) + (1-th [11]) * (1-th [32]) * th
61 p11 [3] <- th [11] * (1-th [31]) * th [34] + (1-th [11]) * th [32] * (1-th
62 p11 [4] <- th [11] * (1-th [31]) * (1-th [34]) + (1-th [11]) * th [32] * th

```

Listing 3 (Cont.): Test characteristics and CanL prevalence when localities are divided in two groups

```

63 p12[1] <- th[12]* th[31] * th[33] + (1-th[12])*(1-th[32])*(1-th
    [36])
64 p12[2] <- th[12]* th[31] *(1-th[33]) + (1-th[12])*(1-th[32])* th
    [36]
65 p12[3] <- th[12]*(1-th[31])* th[34] + (1-th[12])* th[32] *(1-th
    [35])
66 p12[4] <- th[12]*(1-th[31])*(1-th[34]) + (1-th[12])* th[32] * th
    [35]

67
68 th[ 1] ~ dunif(0, 0.5)
69 th[ 2] ~ dunif(0, 0.5)
70 th[ 3] ~ dunif(0, 0.5)
71 th[ 4] ~ dunif(0, 0.5)
72 th[ 5] ~ dunif(0, 0.5)
73 th[ 6] ~ dunif(0, 0.5)
74 th[ 7] ~ dunif(0, 0.5)
75 th[ 8] ~ dunif(0, 0.5)
76 th[ 9] ~ dunif(0, 0.5)
77 th[10] ~ dunif(0, 0.5)
78 th[11] ~ dunif(0, 0.5)
79 th[12] ~ dunif(0, 0.5)
80 th[13] ~ dunif(0, 1)
81 th[14] ~ dunif(0, 1)
82 th[15] ~ dunif(0, 1)
83 th[16] ~ dunif(0, 1)
84 th[17] ~ dunif(0, 1)
85 th[18] ~ dunif(0, 1)
86 th[19] ~ dunif(0, 1)
87 th[20] ~ dunif(0, 1)
88 th[21] ~ dunif(0, 1)
89 th[22] ~ dunif(0, 1)
90 th[23] ~ dunif(0, 1)
91 th[24] ~ dunif(0, 1)
92 th[25] ~ dunif(0, 1)
93 th[26] ~ dunif(0, 1)
94 th[27] ~ dunif(0, 1)
95 th[28] ~ dunif(0, 1)
96 th[29] ~ dunif(0, 1)
97 th[30] ~ dunif(0, 1)
98 th[31] ~ dunif(0, 1)
99 th[32] ~ dunif(0, 1)
100 th[33] ~ dunif(0, 1)
101 th[34] ~ dunif(0, 1)
102 th[35] ~ dunif(0, 1)
103 th[36] ~ dunif(0, 1)
104
105 res13[1:4] ~ dmulti(p01[1:4], n01)
106 res14[1:4] ~ dmulti(p02[1:4], n02)
107 res15[1:4] ~ dmulti(p03[1:4], n03)
108 res16[1:4] ~ dmulti(p04[1:4], n04)
109 res17[1:4] ~ dmulti(p05[1:4], n05)
110 res18[1:4] ~ dmulti(p06[1:4], n06)
111 res19[1:4] ~ dmulti(p07[1:4], n07)
112 res20[1:4] ~ dmulti(p08[1:4], n08)
113 res21[1:4] ~ dmulti(p09[1:4], n09)
114 res22[1:4] ~ dmulti(p10[1:4], n10)

```

Listing 3 (Cont.): Test characteristics and CanL prevalence when localities are divided in two groups

```

115 res23[1:4] ~ dmulti(p11[1:4], n11)
116 res24[1:4] ~ dmulti(p12[1:4], n12)
117
118 for (i in 1:4)
119 {
120 d01[i] <- res01[i]*log(max(res01[i],1)/(p01[i]*n01))
121 d13[i] <- res13[i]*log(max(res13[i],1)/(p01[i]*n01))
122 d02[i] <- res02[i]*log(max(res02[i],1)/(p02[i]*n02))
123 d14[i] <- res14[i]*log(max(res14[i],1)/(p02[i]*n02))
124 d03[i] <- res03[i]*log(max(res03[i],1)/(p03[i]*n03))
125 d15[i] <- res15[i]*log(max(res15[i],1)/(p03[i]*n03))
126 d04[i] <- res04[i]*log(max(res04[i],1)/(p04[i]*n04))
127 d16[i] <- res16[i]*log(max(res16[i],1)/(p04[i]*n04))
128 d05[i] <- res05[i]*log(max(res05[i],1)/(p05[i]*n05))
129 d17[i] <- res17[i]*log(max(res17[i],1)/(p05[i]*n05))
130 d06[i] <- res06[i]*log(max(res06[i],1)/(p06[i]*n06))
131 d18[i] <- res18[i]*log(max(res18[i],1)/(p06[i]*n06))
132 d07[i] <- res07[i]*log(max(res07[i],1)/(p07[i]*n07))
133 d19[i] <- res19[i]*log(max(res19[i],1)/(p07[i]*n07))
134 d08[i] <- res08[i]*log(max(res08[i],1)/(p08[i]*n08))
135 d20[i] <- res20[i]*log(max(res20[i],1)/(p08[i]*n08))
136 d09[i] <- res09[i]*log(max(res09[i],1)/(p09[i]*n09))
137 d21[i] <- res21[i]*log(max(res21[i],1)/(p09[i]*n09))
138 d10[i] <- res10[i]*log(max(res10[i],1)/(p10[i]*n10))
139 d22[i] <- res22[i]*log(max(res22[i],1)/(p10[i]*n10))
140 d11[i] <- res11[i]*log(max(res11[i],1)/(p11[i]*n11))
141 d23[i] <- res23[i]*log(max(res23[i],1)/(p11[i]*n11))
142 d12[i] <- res12[i]*log(max(res12[i],1)/(p12[i]*n12))
143 d24[i] <- res24[i]*log(max(res24[i],1)/(p12[i]*n12))
144 }
145 bayesp[ 1] <- step( sum(d01[]) - sum(d13[]) )
146 bayesp[ 2] <- step( sum(d02[]) - sum(d14[]) )
147 bayesp[ 3] <- step( sum(d03[]) - sum(d15[]) )
148 bayesp[ 4] <- step( sum(d04[]) - sum(d16[]) )
149 bayesp[ 5] <- step( sum(d05[]) - sum(d17[]) )
150 bayesp[ 6] <- step( sum(d06[]) - sum(d18[]) )
151 bayesp[ 7] <- step( sum(d07[]) - sum(d19[]) )
152 bayesp[ 8] <- step( sum(d08[]) - sum(d20[]) )
153 bayesp[ 9] <- step( sum(d09[]) - sum(d21[]) )
154 bayesp[10] <- step( sum(d10[]) - sum(d22[]) )
155 bayesp[11] <- step( sum(d11[]) - sum(d23[]) )
156 bayesp[12] <- step( sum(d12[]) - sum(d24[]) )
157
158 pr[ 1] <- th[ 1]
159 pr[ 2] <- th[ 2]
160 pr[ 3] <- th[ 3]
161 pr[ 4] <- th[ 4]
162 pr[ 5] <- th[ 5]
163 pr[ 6] <- th[ 6]
164 pr[ 7] <- th[ 7]
165 pr[ 8] <- th[ 8]
166 pr[ 9] <- th[ 9]
167 pr[10] <- th[10]
168 pr[11] <- th[11]
169 pr[12] <- th[12]
170

```

Listing 3 (Cont.): Test characteristics and CanL prevalence when localities are divided in two groups

```

171 se1[1] <- th[13]
172 se1[2] <- th[19]
173 se1[3] <- th[25]
174 se1[4] <- th[31]
175 sp1[1] <- th[14]
176 sp1[2] <- th[20]
177 sp1[3] <- th[26]
178 sp1[4] <- th[32]
179
180 se2[1] <- th[13]*th[15]+(1-th[13])*th[16]
181 se2[2] <- th[19]*th[21]+(1-th[19])*th[22]
182 se2[3] <- th[25]*th[27]+(1-th[25])*th[28]
183 se2[4] <- th[31]*th[33]+(1-th[31])*th[34]
184 sp2[1] <- th[14]*th[17]+(1-th[14])*th[18]
185 sp2[2] <- th[20]*th[23]+(1-th[20])*th[24]
186 sp2[3] <- th[26]*th[29]+(1-th[26])*th[30]
187 sp2[4] <- th[32]*th[35]+(1-th[32])*th[36]
188 }
189
190 list(res01 = c(16,47,12,107), n01 = 182,
191 res02 = c(12,50,0,81) , n02 = 143,
192 res03 = c(16,29,13,94) , n03 = 152,
193 res04 = c(19,27,3,120) , n04 = 169,
194 res05 = c(26,56,49,111), n05 = 242,
195 res06 = c(17,54,21,114), n06 = 206,
196 res07 = c(30,64,28,76) , n07 = 198,
197 res08 = c(30,32,30,117), n08 = 209,
198 res09 = c(50,17,19,123), n09 = 209,
199 res10 = c(24,17,7,59) , n10 = 107,
200 res11 = c(63,32,11,97) , n11 = 203,
201 res12 = c(40,21,7,96) , n12 = 164)

```
